# Supplementary material
Source: publisher figshare collection journal article supplement (https://tandf.figshare.com/ndownloader/files/21810252)
Supplement: Supplementary file 1 [file 21810252]

**Table A-1. Green New Deal resolution overall objectives, 10-year mobilization objectives, and goals and projects.**

| GND Goals (H. Res. 109 para. 1, p. 5)                                                                                                                                                                                                                                                                                                                                             | 10-year National Mobilization Goals (para. 2, p. 6)                                                                                                                                                                                                                                                                                                                                                                                                                                                                                                                                                                                                                                                                                                                                                                                                                                                                                                                            | GND “goals and projects” (para. 4, p. 10)                                                                                                                                                                                                                                                                                                                                                                                                                                                                                                                                                                                                                                                                                                                                                                                                                                                                                                                                               |
|-----------------------------------------------------------------------------------------------------------------------------------------------------------------------------------------------------------------------------------------------------------------------------------------------------------------------------------------------------------------------------------|--------------------------------------------------------------------------------------------------------------------------------------------------------------------------------------------------------------------------------------------------------------------------------------------------------------------------------------------------------------------------------------------------------------------------------------------------------------------------------------------------------------------------------------------------------------------------------------------------------------------------------------------------------------------------------------------------------------------------------------------------------------------------------------------------------------------------------------------------------------------------------------------------------------------------------------------------------------------------------|-----------------------------------------------------------------------------------------------------------------------------------------------------------------------------------------------------------------------------------------------------------------------------------------------------------------------------------------------------------------------------------------------------------------------------------------------------------------------------------------------------------------------------------------------------------------------------------------------------------------------------------------------------------------------------------------------------------------------------------------------------------------------------------------------------------------------------------------------------------------------------------------------------------------------------------------------------------------------------------------|
| <p>Net-zero GHG through a fair and just transition</p> <p>Create good jobs for prosperity and economic security</p> <p>Invest in infrastructure and industry</p> <p>Secure clean air &amp; water, climate and community resiliency, food, nature, sustainability</p> <p>Promote justice and equity or systemically marginalized “frontline and vulnerable communities” (FLVC)</p> | <p>Building resiliency against climate change disasters</p> <p>Repairing and upgrading infrastructure (eliminate pollution and GHG, ensure clean water, reduce floods etc.)</p> <p>100% renewable power</p> <p>Building a “smart” power grid</p> <p>Upgrade all existing/new buildings for max efficiency</p> <p>Growth in clean manufacturing</p> <p>Eliminate pollution and GHG from agriculture (sustainable farming etc.)</p> <p>Eliminate pollution and GHG from transportation (zero emissions vehicles, public transport, high-speed rail)</p> <p>Mitigate health and economic impacts of climate change, fund community-driven projects</p> <p>Remove GHG with natural ecosystems, preservation, and afforestation</p> <p>Restore and protect fragile ecosystems</p> <p>Clean up hazardous sites</p> <p>Identify other emissions and pollution sources</p> <p>Promote international exchange of technology and expertise to make U.S. a leader in climate response</p> | <p>Provide and leverage public ownership and returns</p> <p>Complete environmental and social costs (existing and new laws &amp; programs, protect FLVC)</p> <p>Resources, training, and education for FLVC</p> <p>Public investments in clean technologies</p> <p>Prioritize FLVC in green transition</p> <p>Democratic &amp; participatory process inclusive of FLVC</p> <p>Good union jobs</p> <p>Job guarantee with good benefits</p> <p>Right to organize and unionize</p> <p>Strengthen labor health, safety, and economic standards</p> <p>Trade rules with labor and environmental protection (stop job transfer, grow domestic manufacturing)</p> <p>Protect public lands and waters</p> <p>Indigenous consent for decisions affecting people and territories</p> <p>Protection from unfair competition and monopolies</p> <p>Provide all people of the U.S. with healthcare, affordable/just housing, economic security, and access to clean water, air, food, and nature</p> |

Note: GHG = greenhouse gases.

**Table A-2. Selected New Deal legislation and programs with urban spatial planning impact.**

| <b>New Deal Legislation/Key Program</b>                                                           | <b>Date</b>  | <b>Objective</b>                                                                             | <b>Spatial Planning Impact</b>                                                               |
|---------------------------------------------------------------------------------------------------|--------------|----------------------------------------------------------------------------------------------|----------------------------------------------------------------------------------------------|
| Emergency Banking Relief Act                                                                      | Mar 1933     | Shore up banking system                                                                      | Financial system                                                                             |
| Emergency Conservation Work Act/Civilian Conservation Corps ( <b>CCC</b> )                        | Mar 1933     | Employment in forest and parks                                                               | Labor and employment for large-scale environmental management                                |
| Federal Emergency Relief Act/Federal Emergency Relief Administration ( <b>FERA</b> )              | May 1933     | Federal oversight of state work and cash relief programs                                     | Labor for public infrastructure and buildings                                                |
| Tennessee Valley Authority Act/Tennessee Valley Authority ( <b>TVA</b> )                          | May 1933     | Economic development, flood management, and electrification                                  | Watershed infrastructure and settlement planning; public utilities management                |
| Home Owners' Loan Act/Home Owners Loan Corporation ( <b>HOLC</b> )                                | Jun 1933     | Refinance troubled homeowner mortgages                                                       | Federal finance system for housing                                                           |
| National Industrial Recovery Act/Public Works Administration ( <b>PWA</b> )                       | Jun 1933     | Regulate industry/funds to states and localities for public works                            | Funding for infrastructure; national public works program                                    |
| Civil Works Administration ( <b>CWA</b> ) (also through National Industrial Recovery Act)         | Nov 1933     | Create jobs for unemployed workers                                                           | Labor for public infrastructure and buildings                                                |
| Public Works of Art Project ( <b>PWAP</b> ) (through CWA funds)                                   | Dec 1933     | CWA funds to employ artists                                                                  | Federal funds for public art                                                                 |
| National Housing Act/Federal Housing Administration ( <b>FHA</b> )                                | Jun 1934     | Set construction standards/provide mortgage loan insurance                                   | Finance for housing; standardized 30-year mortgage; suburban housing growth                  |
| Emergency Relief Appropriation Act/Resettlement Administration ( <b>RA</b> )                      | Apr–May 1935 | Financial aid, relocation, land conservation, infrastructure building                        | Environmental management; cooperative communities; settlement planning (e.g., Greenbelt, MD) |
| Works Progress Administration ( <b>WPA</b> ) (also through Emergency Relief Appropriation Act)    | May 1935     | Work relief program, buildings, infrastructure, and art (through Federal Project Number One) | Labor for public infrastructure and public art                                               |
| Rural Electrification Administration ( <b>REA</b> )                                               | May 1935     | Loans for electrification for rural areas                                                    | Finance for infrastructure; public utilities management                                      |
| United States Housing Act (“Wagner-Steagall Act”)/United States Housing Authority ( <b>USHA</b> ) | Sep 1937     | Safe housing for poor people; loans to local housing authorities                             | Finance for housing                                                                          |

Note: Compiled with data from Living New Deal, National Archives, U.S. Department of Housing and Urban Development, and the Roosevelt Institute.
